# Supplementary material for: Magnetic-gold theranostic nanoagent used for targeting quad modalities T1 & T2-MRI/CT/PA imaging and photothermal therapy of tumours
Source: Royal Society of Chemistry journal article supplement (doi:10.1039/d1ra02041b), 2021-01-01
Supplement: d1ra02041b1.pdf [file d1ra02041b1.pdf]

# Magnetic-gold theranostic nanoagent used for targeting quadmodalities $T_1$ & $T_2$ -MRI/CT/PA imaging and photothermal therapy of tumour

Jinlei Liu <sup>a†</sup>, Dan Wang <sup>b†</sup> and Guannan Wang <sup>a,c \*</sup>

<sup>a</sup> The First Affiliated Hospital of Jinzhou Medical University, Jinzhou, 121001, China.

<sup>b</sup> Basic Medical College, Beihua University, Jilin, 132013, China.

<sup>c</sup> College of Biomedical Engineering & the Key Laboratory for Medical Functional Nanomaterials, Jining Medical University, Jining, 272067, China.

\*Corresponding Author:

Email address: chemwangguannan@gmail.com (G. N. Wang)

Tel/Fax: +86-537-7907618

† These two authors contributed equally to this work.

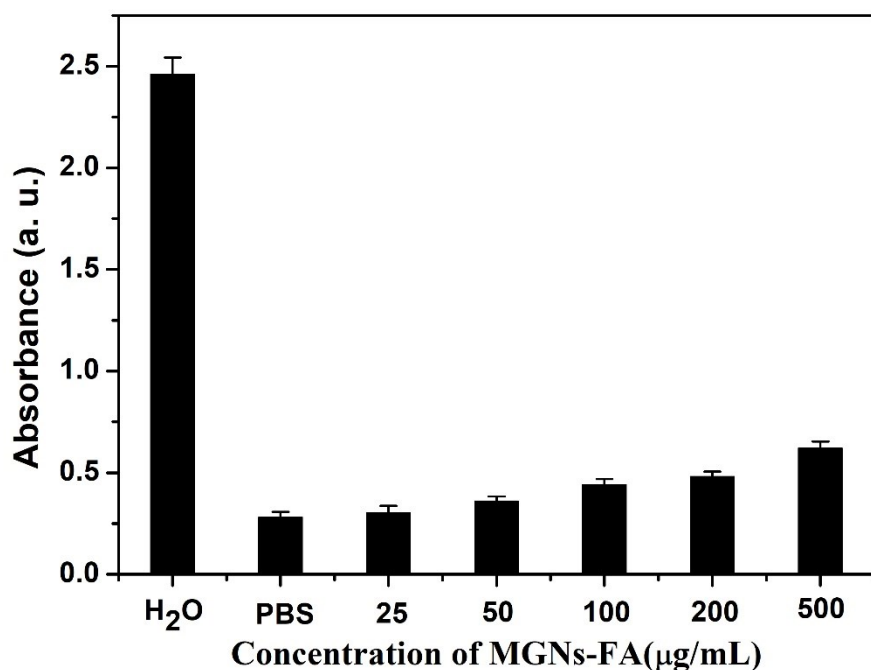

**Figure S1** Hemolysis assay of MGN-FA with various concentration incubation with red blood cells.

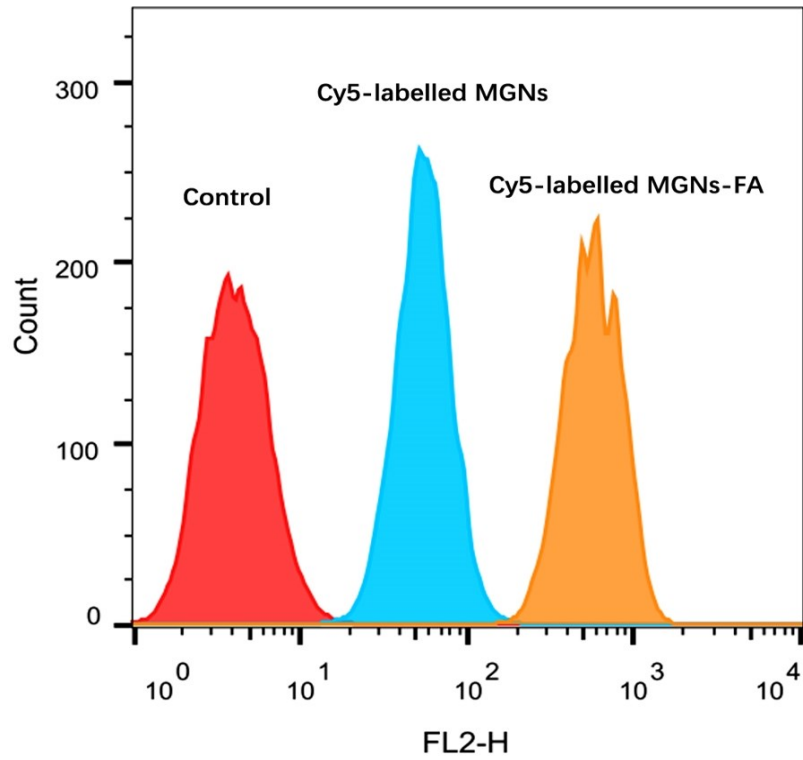

**Figure S2** Flow cytometry measurement of cells after uptake of Cy5-labelled MGNs-FA and Cy5-labelled MGNs.

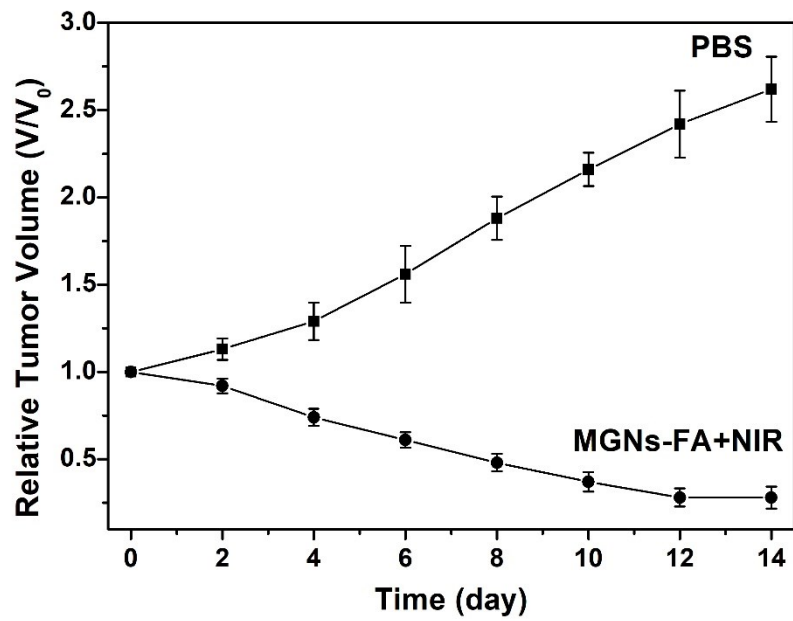

**Figure S3.** The tumor volume change during 14 days of PTT therapy.
